# Supplementary material for: Sleep Duration, Sleep Quality and Physical Activity, but Not Sedentary Behaviour, Are Associated with Positive Mental Health in a Multi-Ethnic Asian Population: A Cross-Sectional Evaluation
Source: PubMed Central journal article supplement (PMC7697582; doi:10.3390/ijerph17228489), 2020-11-16
Supplement: ijerph-17-08489-s001.pdf [file ijerph-17-08489-s001.pdf]

**Table S1:** Association of physical activity in work, transport and leisure domains in relation to Positive Mental Health domains

| Physical activity <sup>®</sup> | Multivariable Model 1* |        |       |         | Multivariable Model 2# |        |       |         |
|--------------------------------|------------------------|--------|-------|---------|------------------------|--------|-------|---------|
|                                | $\beta$                | 95% CI |       | P trend | $\beta$                | 95% CI |       | P trend |
|                                |                        | Lower  | Upper |         |                        | Lower  | Upper |         |
| <b>Work domain</b>             |                        |        |       |         |                        |        |       |         |
| Total Positive Mental Health   | 0.070                  | 0.040  | 0.100 | <0.001  | 0.070                  | 0.030  | 0.120 | 0.001   |
| General coping                 | 0.090                  | 0.040  | 0.130 | <0.001  | 0.090                  | 0.030  | 0.140 | 0.002   |
| Emotional support              | 0.040                  | -0.020 | 0.090 | 0.167   | 0.070                  | 0.010  | 0.120 | 0.025   |
| Spirituality                   | 0.070                  | -0.010 | 0.16  | 0.076   | 0.030                  | -0.070 | 0.140 | 0.544   |
| Interpersonal skills           | 0.090                  | 0.050  | 0.130 | <0.001  | 0.090                  | 0.040  | 0.130 | <0.001  |
| Personal growth and autonomy   | 0.090                  | 0.050  | 0.130 | <0.001  | 0.100                  | 0.050  | 0.150 | <0.001  |
| Global affect                  | 0.00                   | -0.040 | 0.040 | 0.941   | 0.020                  | -0.040 | 0.070 | 0.559   |
| <b>Transport domain</b>        |                        |        |       |         |                        |        |       |         |
| Total Positive Mental Health   | 0.100                  | 0.040  | 0.160 | 0.001   | 0.060                  | 0.010  | 0.110 | 0.027   |
| General coping                 | 0.120                  | 0.060  | 0.190 | <0.001  | 0.100                  | 0.030  | 0.180 | 0.007   |
| Emotional support              | 0.080                  | 0.010  | 0.150 | 0.033   | 0.040                  | -0.050 | 0.120 | 0.399   |
| Spirituality                   | 0.110                  | -0.030 | 0.250 | 0.112   | 0.070                  | -0.070 | 0.220 | 0.322   |
| Interpersonal skills           | 0.100                  | 0.030  | 0.160 | 0.003   | 0.040                  | -0.030 | 0.120 | 0.277   |
| Personal growth and autonomy   | 0.120                  | 0.050  | 0.190 | 0.001   | 0.050                  | -0.030 | 0.130 | 0.196   |
| Global affect                  | 0.080                  | 0.000  | 0.160 | 0.046   | 0.060                  | -0.030 | 0.160 | 0.188   |
| <b>Leisure domain</b>          |                        |        |       |         |                        |        |       |         |
| Total Positive Mental Health   | 0.210                  | 0.070  | 0.350 | 0.003   | 0.160                  | -0.040 | 0.350 | 0.110   |
| General coping                 | 0.230                  | -0.040 | 0.510 | 0.095   | 0.090                  | -0.330 | 0.500 | 0.680   |
| Emotional support              | 0.220                  | 0.070  | 0.380 | 0.004   | 0.230                  | 0.040  | 0.430 | 0.020   |
| Spirituality                   | 0.030                  | -0.260 | 0.320 | 0.838   | 0.060                  | -0.340 | 0.460 | 0.759   |
| Interpersonal skills           | 0.230                  | 0.090  | 0.370 | 0.001   | 0.210                  | 0.040  | 0.380 | 0.015   |
| Personal growth and autonomy   | 0.280                  | 0.140  | 0.420 | <0.001  | 0.230                  | 0.060  | 0.410 | 0.010   |
| Global affect                  | 0.200                  | 0.090  | 0.320 | 0.001   | 0.060                  | -0.100 | 0.220 | 0.460   |

<sup>®</sup> Metabolic Equivalent Tasks (METs) in hours per week derived from moderate or vigorous activity in respective domains of activity, estimates are expressed for 10 MET hours/week, \*General linear regression models adjusted for: Age, Gender (Men, Women), Ethnicity (Chinese, Malay, Indian, Other), #General linear regression models adjusted for: Age, Gender (Men, Women), Ethnicity (Chinese, Malay, Indian, Other), Marital status (Never married, Married, Separated/Divorced/ Widowed), Education level (Primary and below, Secondary, Post-secondary, University), Employment status (Employed, Unemployed),

Body Mass Index (underweight, normal weight, overweight, obese), Any chronic physical condition (Yes, No), Alcohol consumption in past 12 months (Excessive, Non-excessive, None), Current smoking status (Daily, Occasional, Past, Never).

**Table S2:** Sensitivity analysis investigating the multivariable-adjusted association of sleep duration in relation with total positive mental health score excluding participants with fairly or very bad sleep quality (n=1707)

|                                                                          | $\beta$ | 95% CI |       | P trend |
|--------------------------------------------------------------------------|---------|--------|-------|---------|
|                                                                          |         | Lower  | Upper |         |
| <b>Sleep duration (hours per night)</b>                                  |         |        |       | 0.012   |
| $\geq 8$                                                                 | 0.143   | -0.034 | 0.319 |         |
| 7-<8                                                                     | 0.153   | -0.009 | 0.314 |         |
| 6-<7                                                                     | -0.019  | -0.188 | 0.150 |         |
| <6                                                                       | Ref     |        |       |         |
| <b>With different domains of Positive Mental Health (per 1 hr/night)</b> |         |        |       |         |
| General coping                                                           | 0.039   | -0.017 | 0.096 | 0.175   |
| Emotional support                                                        | 0.088   | 0.030  | 0.145 | 0.003   |
| Spirituality                                                             | 0.068   | -0.025 | 0.161 | 0.149   |
| Interpersonal skills                                                     | 0.026   | -0.021 | 0.073 | 0.285   |
| Personal growth and autonomy                                             | 0.057   | 0.006  | 0.108 | 0.028   |
| Global affect                                                            | 0.088   | 0.036  | 0.140 | 0.001   |

General linear regression models adjusted for: Age, Gender (Men, Women), Ethnicity (Chinese, Malay, Indian, Other), Marital status (Never married, Married, Separated/Divorced/ Widowed), Education level (Primary and below, Secondary, Post-secondary, University), Employment status (Employed, Unemployed), Body Mass Index (underweight, normal weight, overweight, obese), Any chronic physical condition (Yes, No), Alcohol consumption in past 12 months (Excessive, Non-excessive, None), Current smoking status (Daily, Occasional, Past, Never).
